# Supplementary material for: Validity of self-reported diagnoses of gynaecological and breast cancers in a prospective cohort study: the Japan Nurses’ Health Study
Source: HighWire-hosted journal article supplement (doi:10.1136/bmjopen-2020-045491), 2021-06-01

**Appendix Figure 1** Flow diagram illustrating the validation process for self-reported cervical cancer  
(BL: baseline, CIS: carcinoma in situ, DCO: death certificate only)

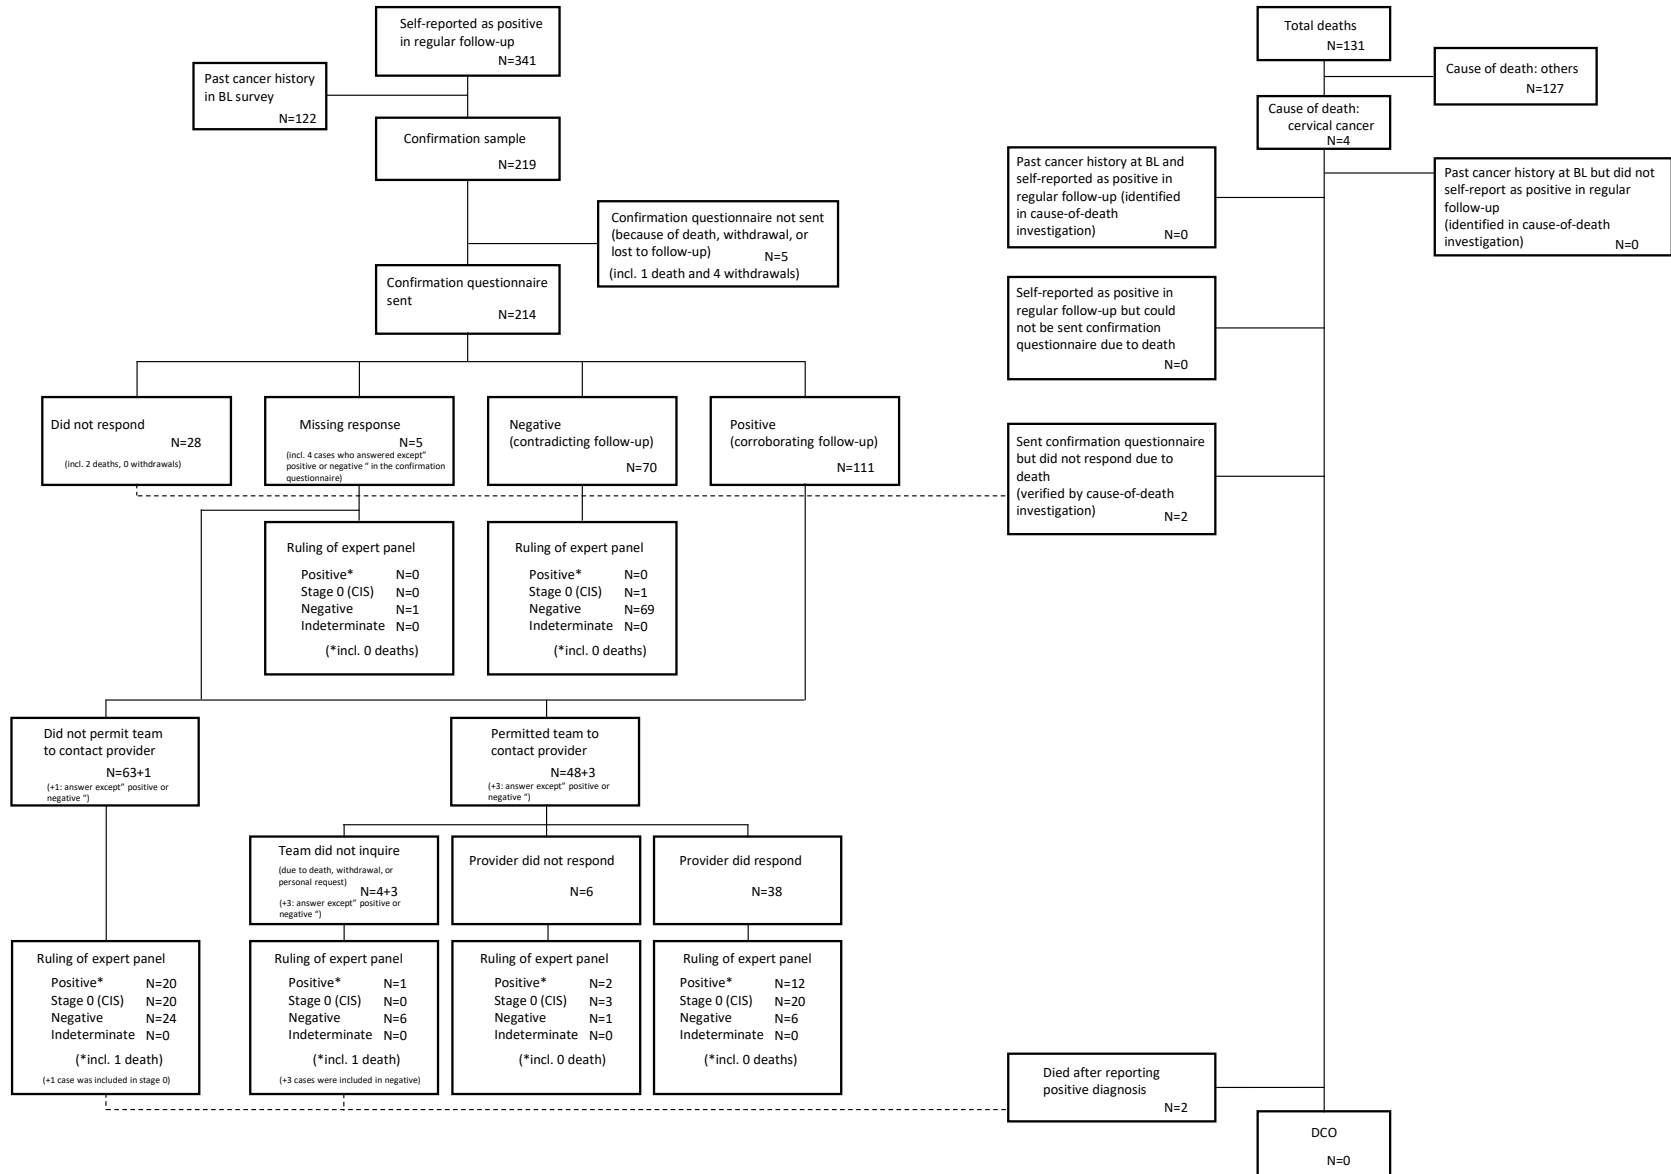

**Appendix Figure 2** Flow diagram illustrating the validation process for self-reported endometrial cancer (BL: baseline, aEmH: atypical endometrial hyperplasia, DCO: death certificate only)

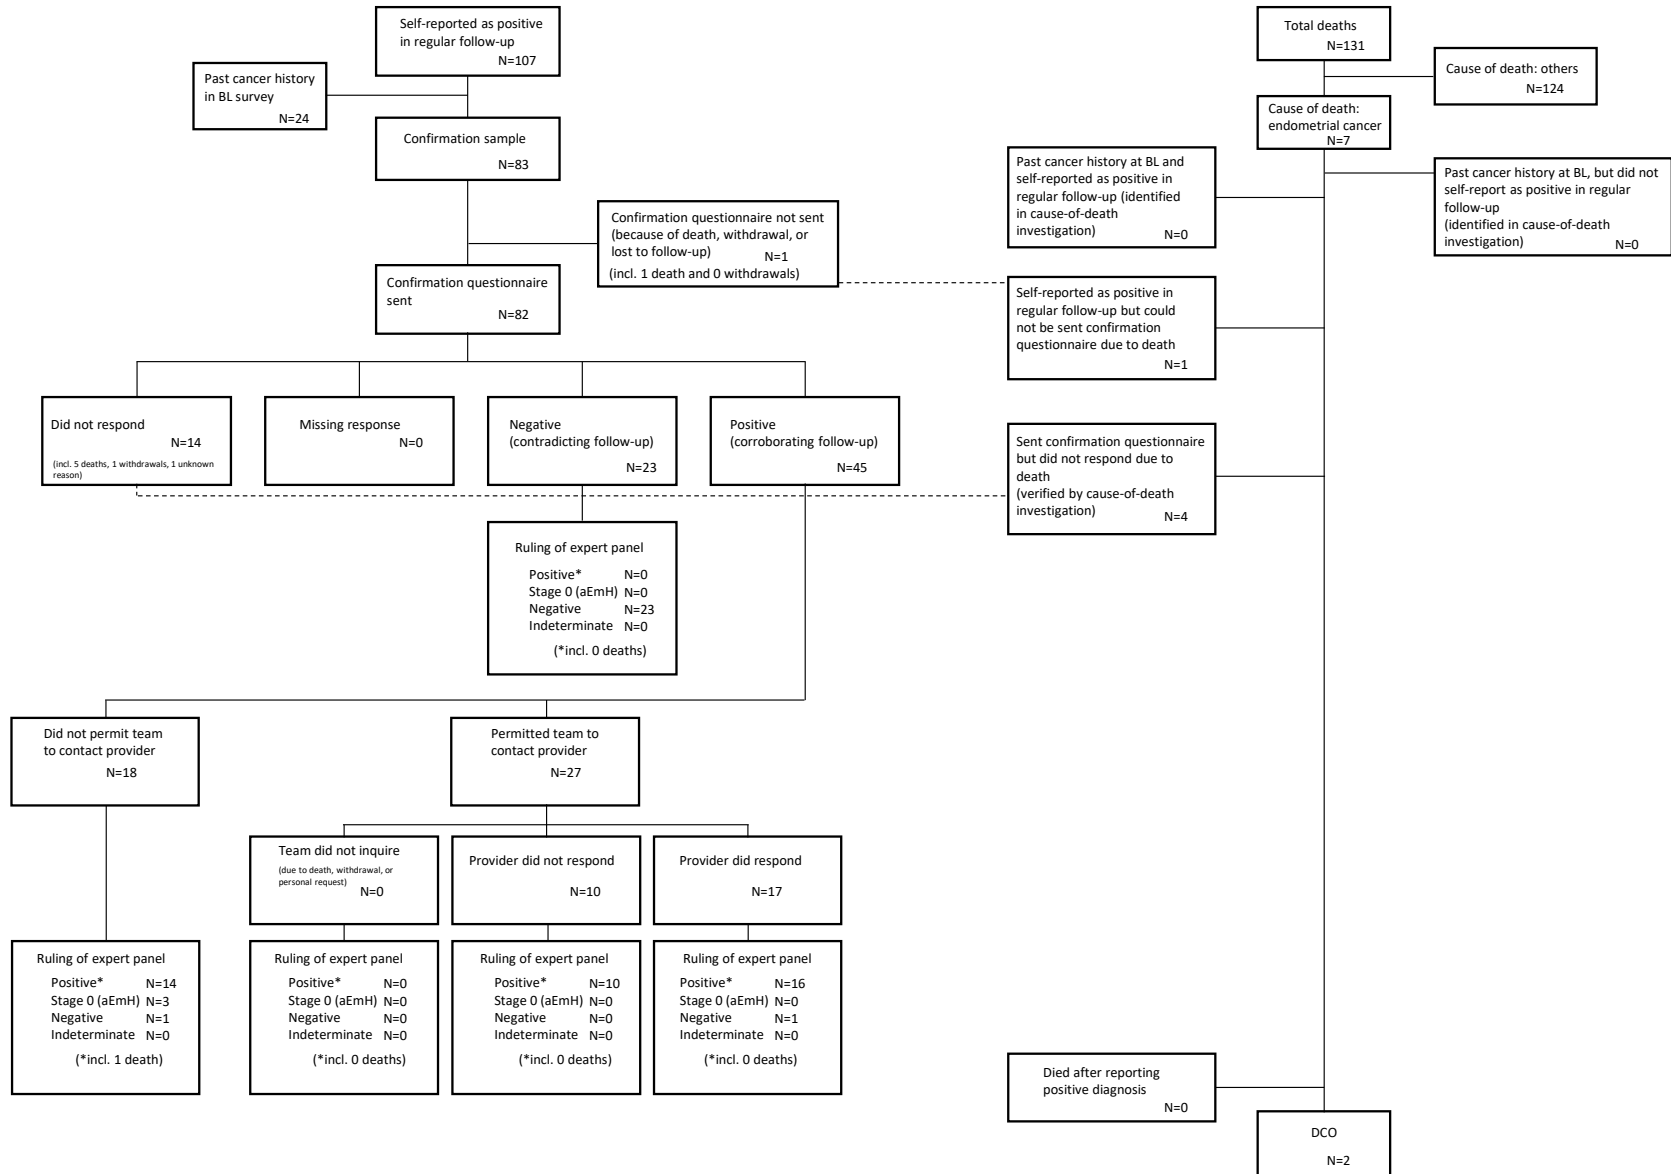

### Appendix Figure 3 Flow diagram illustrating the validation process for self-reported ovarian cancer (BL: baseline, DCO: death certificate only)

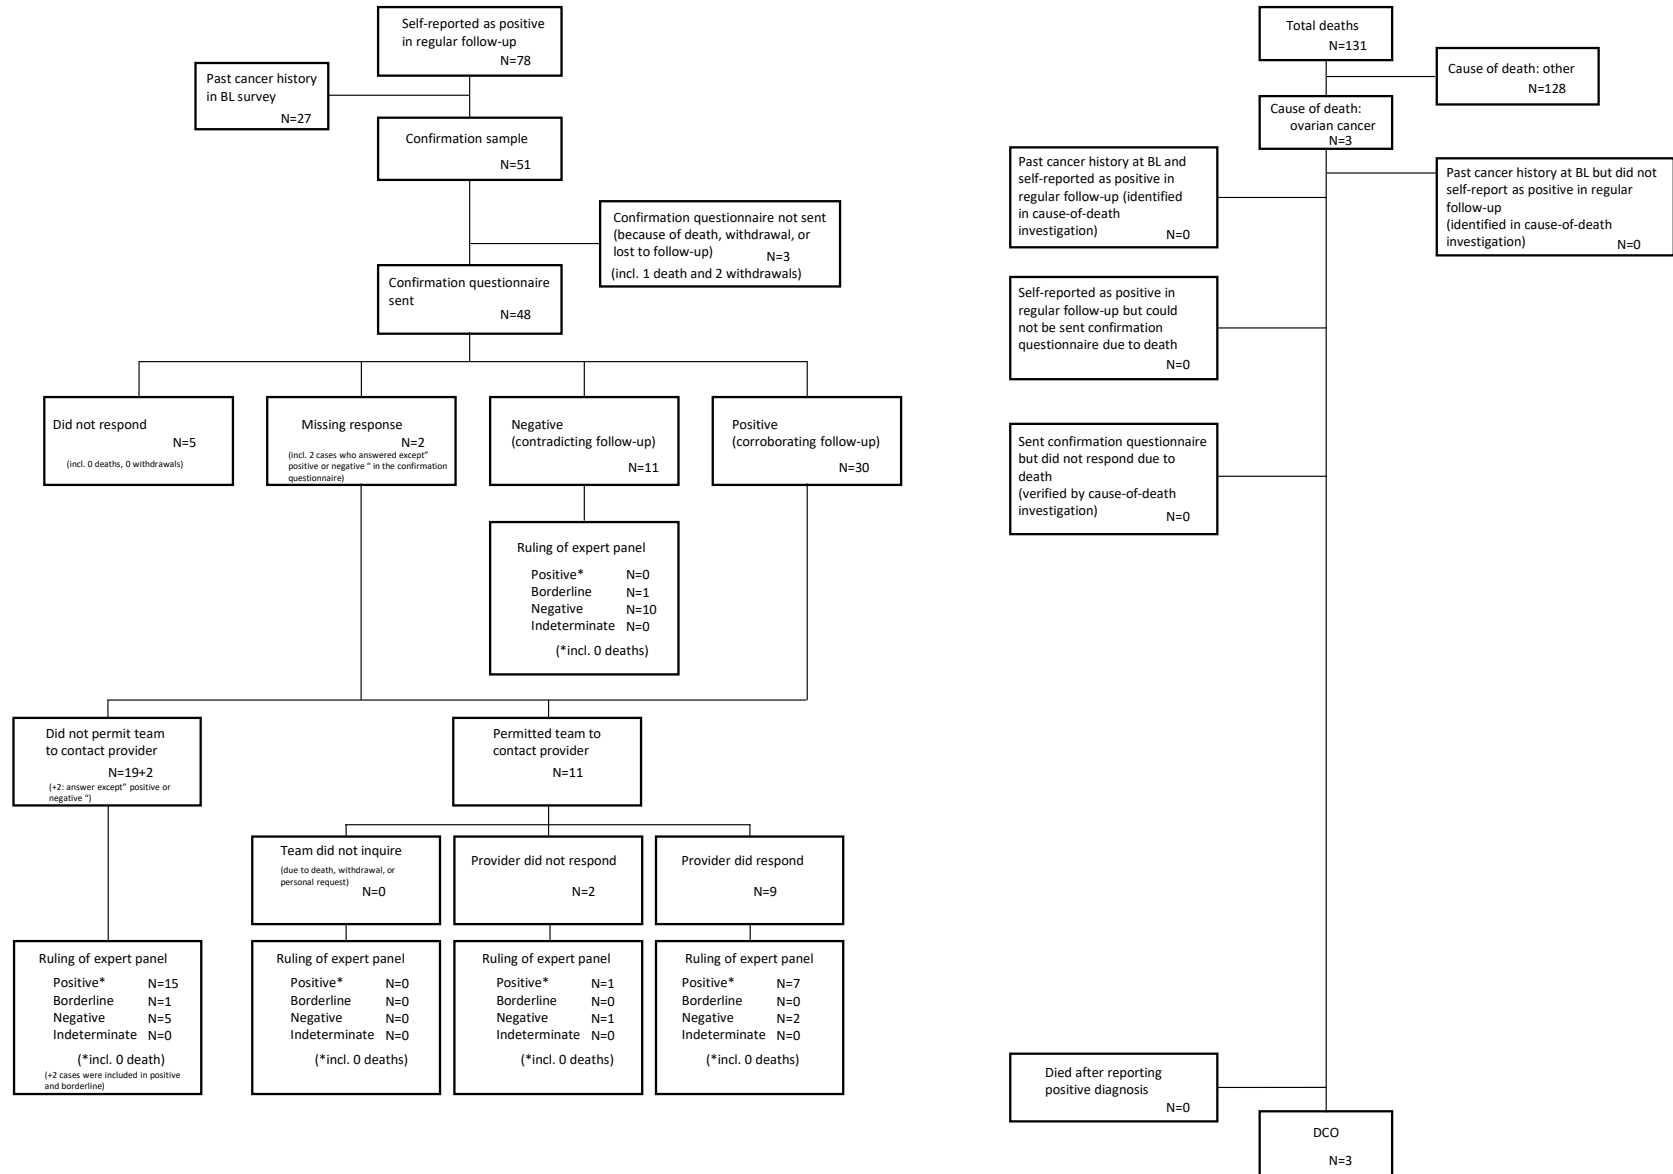

### Appendix Figure 4 Flow diagram illustrating the validation process for self-reported breast cancer (BL: baseline, CIS: carcinoma in situ, DCO: death certificate only)

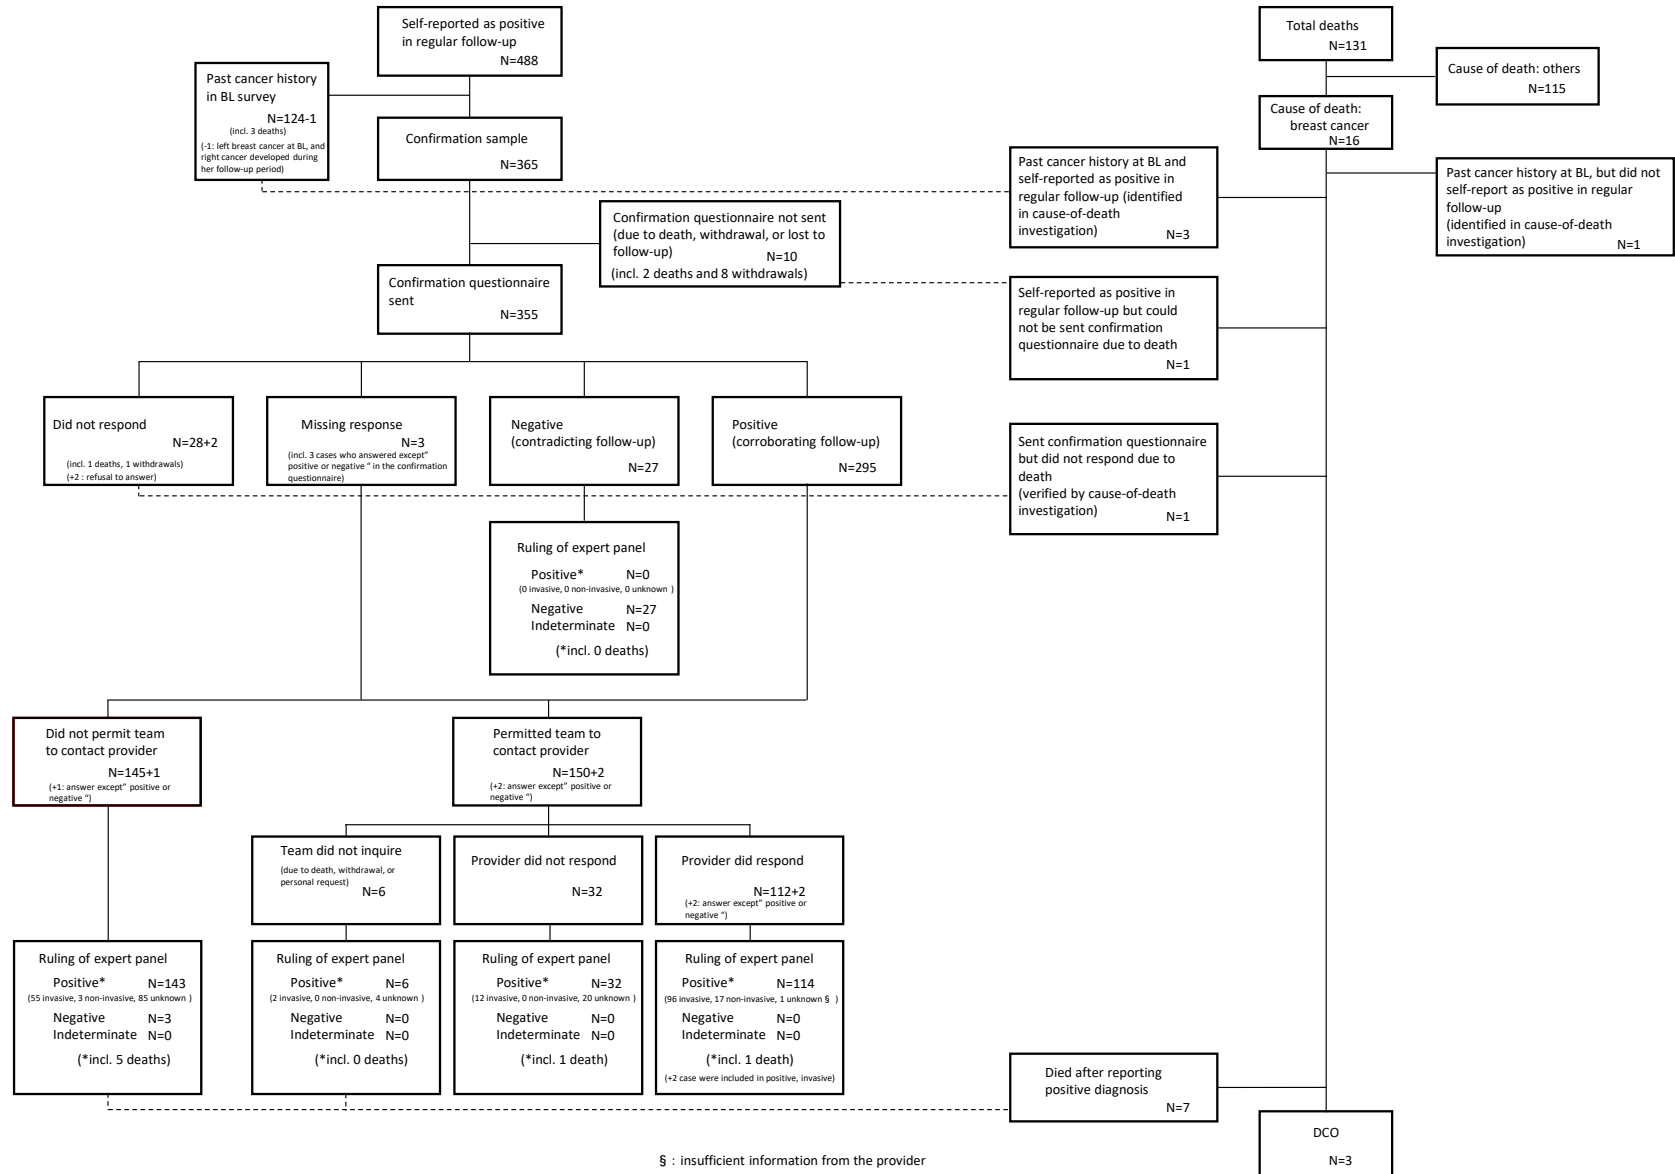

Supplement: bmjopen-2020-045491supp001_data_supplement.pdf [file bmjopen-2020-045491supp001_data_supplement.pdf]
